# Supplementary material for: CellCharter reveals spatial cell niches associated with tissue remodeling and cell plasticity
Source: bioRxiv or medRxiv preprint supplement (doi:10.1101/2023.01.10.523386), 2024-02-07
Supplement: Supplementary file [file media-2.pdf]

| Number of clusters | Tumor cluster | Proportion of cluster cells labeled as tumor | Proportion of tumor cells assigned to a tumor cluster |
|--------------------|---------------|----------------------------------------------|-------------------------------------------------------|
| 3                  | C0            | 0.8977                                       | 0.9410                                                |
| 8                  | C0            | 0.4272                                       | 0.9129                                                |
|                    | C2            | 0.9727                                       |                                                       |
|                    | C4            | 0.9356                                       |                                                       |
|                    | C7            | 0.9632                                       |                                                       |
| 20                 | C0            | 0.9544                                       | 0.9228                                                |
|                    | C3            | 0.7128                                       |                                                       |
|                    | C4            | 0.9892                                       |                                                       |
|                    | C7            | 0.4317                                       |                                                       |
|                    | C12           | 0.9976                                       |                                                       |
|                    | C15           | 0.9999                                       |                                                       |
|                    | C18           | 0.6023                                       |                                                       |
|                    | C19           | 0.9813                                       |                                                       |

**Supplementary table 1.** Proportion of tumor cells in clusters labeled as “tumor clusters” in the CosMx NSCLC dataset. Clustering was performed for three values of number of clusters (3, 8, and 20). For each of them, we labeled the clusters enriched in tumor cells as tumor clusters. The table shows the proportion of cells in each of those clusters that are tumor cells and, for each clustering, out of all tumor cells in the dataset, how many of them were assigned to a tumor cluster.
